# Supplementary material
Source: PubMed Central journal article supplement (PMC4939857)
Supplement: NIHMS68292-supplement-Supplementary_legends.pdf [file NIHMS68292-supplement-Supplementary_legends.pdf]

1 **Supplementary Figures legend**

2

3 **Supplementary Figure 1. BACs replication in egg extract** (a) L10 DNA BAC or  
4 Sperm chromatin incubated in *Xenopus* egg extract with <sup>32</sup>PdCTP. DNA synthesis  
5 was monitored by measuring the percentage of radiolabelled nucleotide  
6 incorporation relative to the input DNA. Error bars represent ± sd of the mean.  
7 n=3 independent experiments; p<0.05 when comparing L10 and B18 mean  
8 values; unpaired two-tailed t-test. (b) L10 BAC was replicated in egg extract in  
9 the presence of geminin or roscovitine and <sup>32</sup>PdCTP. Incorporation of  
10 radiolabelled nucleotides was monitored by autoradiography and relative  
11 intensities were plotted on the graph, considering maximum values as 1. Error  
12 bars represent ± sd of the mean. n=3 independent experiments; p<0.001 when  
13 comparing mean values for all the indicated treatments; One-way Anova. (c)  
14 Replicating L10 BAC was pulse labelled with <sup>32</sup>PdCTP for 20 minutes and  
15 samples were fixed and analyzed at the indicated time by autoradiography.  
16 Quantification of one representative experiment is shown. (d) Chromatin was  
17 isolated at different times using L10 BAC DNA incubated in egg extracts treated  
18 with geminin or roscovitine and then analyzed by WB as indicated. (e) Graph  
19 showing incorporation of <sup>32</sup>PdCTP in fractions derived from CsCl gradient  
20 centrifugation of sperm and L10 BAC DNA replicated in egg extract in the  
21 presence of <sup>32</sup>PdCTP and BrdUTP. Heavy-Light (HL) and Heavy-Heavy (HH) DNA  
22 fractions are indicated. Quantification performed as in (b) from one  
23 representative experiment is shown. (f) Molecular combing of RP11-1051L10  
24 (L10) and RP11-5B18 (B18) BACs fully replicated in the presence of  
25 digoxigenin-dUTP (green). (g) Table representing the nomenclature, the size  
26 and the chromosome regions of the BACs used in the present study. (h)  
27 Chromosome mapping of the centromere BACs. (i) Graph showing the  
28 percentage of alpha-satellite sequences in each centromeric BAC used. (j) Graph  
29 showing the GC base content in the BAC DNA sequences. (k) Replication of B18  
30 and L10 DNA BACs incubated for five hours in *Xenopus* egg extracts  
31 supplemented with <sup>32</sup>PdCTP. DNA synthesis was monitored by measuring the  
32 percentage of radiolabelled nucleotides incorporation relative to the input DNA.  
33 Error bars represent ± sd of the mean. n=3 experiments; p<0.001 when

34 comparing L10 and B18 mean values; unpaired two-tailed t-test. **(l)** DNA  
35 replication of the different BACs DNA described in (g). Average percentage of  
36 <sup>32</sup>PdCTP incorporation. L10 values were considered as 100%. Error bars  
37 represent ± sd of the mean. *n*=3 experiments; *p*<0.001 when comparing DNA  
38 replication mean values for all the indicated BACs; Two-way Anova. **(m)** and **(n)**  
39 Control and centromeric chromatin was isolated at the indicated times and then  
40 analyzed by WB using the indicated antibodies. **(o)** Analysis of the average inter-  
41 origin distance (IODs) relative to at least hundred fibres of DNA in replicated L10  
42 and B18 BACs. Error bars represent ± sd of the mean. *n*=3 experiments; *p*<0.001  
43 when comparing L10 and B10 mean values; unpaired two tailed t-test.

44

45 **Supplementary Figure 2. Proteomic analysis and validation of control and**  
46 **centromeric chromatin.** **(a)** Scheme of MS experiments (see text). **(b)** STRING  
47 analysis of DNA repair factors enriched on centromeric chromatin. **(c)** WB  
48 analysis of L10 and B18 chromatin isolated at 150 minutes from DNA addition to  
49 egg extract and probed with the indicated antibodies. *MSH2* antibodies used here  
50 were different from the ones used in Fig 3. Graphs showing *TopBP1* **(d)** and  
51 *MSH2* **(e)** relative abundance on control L10 and centromeric B18 chromatin  
52 compared to *ATR*. Error bars represent ± sd of the mean. *n*=3 experiments;  
53 *p*<0.05 when comparing L10 and B10 mean values for TopBp1-ATR and MSH2-  
54 ATR ratios; One-way Anova.

55

56

57 **Supplementary Figure 3. Visualization by EM of L10 and B18 DNA**  
58 **intermediates.** **(a)** EM of a segment of L10 DNA isolated after 150 minutes  
59 incubation in interphase egg extract. **(b)** EM of intact circular centromeric B18  
60 DNA molecule not incubated in egg extract. **(c)** A typical replication bubble made  
61 of doubled stranded DNA (dsDNA). **(d)** Typical ssDNA bubble observed on  
62 centromeric b18 DNA. Differences in ssDNA and dsDNA fiber thickness can be  
63 appreciated. **(e)** Graph showing the frequency of ssDNA bubbles for each mega  
64 base of non-centromeric DNA (L10) or centromeric B18 DNA incubated in egg  
65 extracts that were untreated (B18) or treated with geminin (B18 + Geminin).  
66 Experiments were repeated three times and one mega base of total DNA was

67 scored. Error bars represent  $\pm$  sd of the mean.  $n=3$  experiments;  $p<0.001$  when  
68 comparing L10, B10 and B10 + Geminin mean values; One-way Anova. (f) Typical  
69 replication fork intermediate present on B18 DNA.

70

71 **Supplementary Figure 4. DNA isolation procedure for EM.** (a) Nuclei were  
72 isolated at different times from addition of L10 or B18 BAC DNA to egg extract  
73 and subjected to psoralen photo-crosslinking with 365 nm UV light. Chromatin  
74 was completely digested with 1 mg ml<sup>-1</sup> Proteinase K for 2 hours at 37°C. DNA  
75 was isolated by phenol:chloroform extraction (25:25 v v<sup>-1</sup>) and spread in the  
76 presence of 1.5 % formamide on carbon coated EM grids, which were subjected  
77 to rotary shadowing. (b) Scheme showing DNA positive supercoil (+) mediated  
78 inhibition of psoralen crosslinking, resulting in ssDNA bubbles after melting in  
79 mild denaturing conditions used for the EM preparation.

80

81 **Supplementary Figure 5. Condensins accumulation and structural**  
82 **arrangement of centromeric chromatin.** (a) WB analysis showing *SMC2*  
83 loading on L10 and B18 chromatin isolated at 150 and 300 minutes from BAC  
84 DNA addition to egg extract. *MCM7* was used as loading control (b) Graphs  
85 showing *SMC2* relative abundance on control L10 and centromeric B18  
86 chromatin compared to *MCM7*. Error bars represent  $\pm$  sd of the mean.  $n=3$   
87 experiments;  $p<0.01$  when comparing L10 and B18 mean values for the  
88 indicated times; One-way Anova. (c) TUNEL assay showing <sup>32</sup>PdCTP incorporation  
89 catalysed by Terminal Transferase (TdT) on DNA derived from L10 and B18  
90 nuclei isolated from egg extracts that were untreated, treated with topotecan  
91 (TPT) or HAEIII restriction enzyme. The latter treatment was used as positive  
92 control of double strand breaks formation. Error bars represent  $\pm$  sd of the  
93 mean.  $n=3$  experiments;  $p<0.05$  when comparing L10 and B18 mean values for  
94 all the indicated treatments; One-way Anova. (d) WB analysis showing *SMC2*  
95 loading on B18 chromatin isolated at 0 and 300 minutes from addition of DNA to  
96 egg extract supplemented with topotecan (TPT) (+) or left untreated (-). *MCM7*  
97 was used as loading control. A representative result is shown. (e) Modified EM  
98 protocol used to analyse BAC chromatin. Nuclei were isolated at different times  
99 from addition of L10 or B18 DNA to egg extracts and subjected to psoralen

100 photo-crosslinking with 365 nm UV light. Chromatin was treated with 1 mg ml<sup>-1</sup>  
101 Proteinase K for 5 minutes at 30°C. DNA was isolated by phenol:chloroform  
102 extraction (25:5 v v<sup>-1</sup>) and spread in the presence of 1.5 % formamide on carbon  
103 coated EM grids, which were subjected to rotary shadowing. (f) WB showing  
104 levels of *SMC2* protein present on B18 derived centromeric chromatin following  
105 procedures for EM staining performed at low (5 minutes) and high (2 hours)  
106 proteinase K treatment (See Methods). A typical result of is shown.

107

108 **Supplementary figure 6.** Whole scans relative to cropped immunoblot images.  
109 Red boxes indicate the cropped regions used to assemble images in the present  
110 study. Black bars indicate position of size markers (kDa). Some panels include  
111 samples not used.

112

### 113 **Table titles and legend**

114

115 **Table S1. Total proteins identified by MS.** The table contains raw data for  
116 proteins and peptides identified by MS.

117

118 **Table S2. Proteins differentially represented on centromeric and non-**  
119 **centromeric chromatin in biological replicates.**

120 The table contains proteins differentially represented on centromeric and non  
121 centromeric DNA (B18\_L10) and on centromeric DNA in the absence or in the  
122 presence of geminin (B18\_B18+) in three biological replicates (Bio1, Bio2, and  
123 Bio3).

124

125 **Table S3. Proteins differentially represented on centromeric and non-**  
126 **centromeric chromatin considered for heatmap.** The table contains protein  
127 differentially represented on centromeric (B18) and non centromeric (L10) DNA  
128 and on centromeric DNA in the presence of geminin (B18+) considered for the  
129 heatmap analysis shown in Fig 2c. Color code is described in Fig 2.

130

131
