# Supplementary material
Source: PubMed Central journal article supplement (PMC4939857)

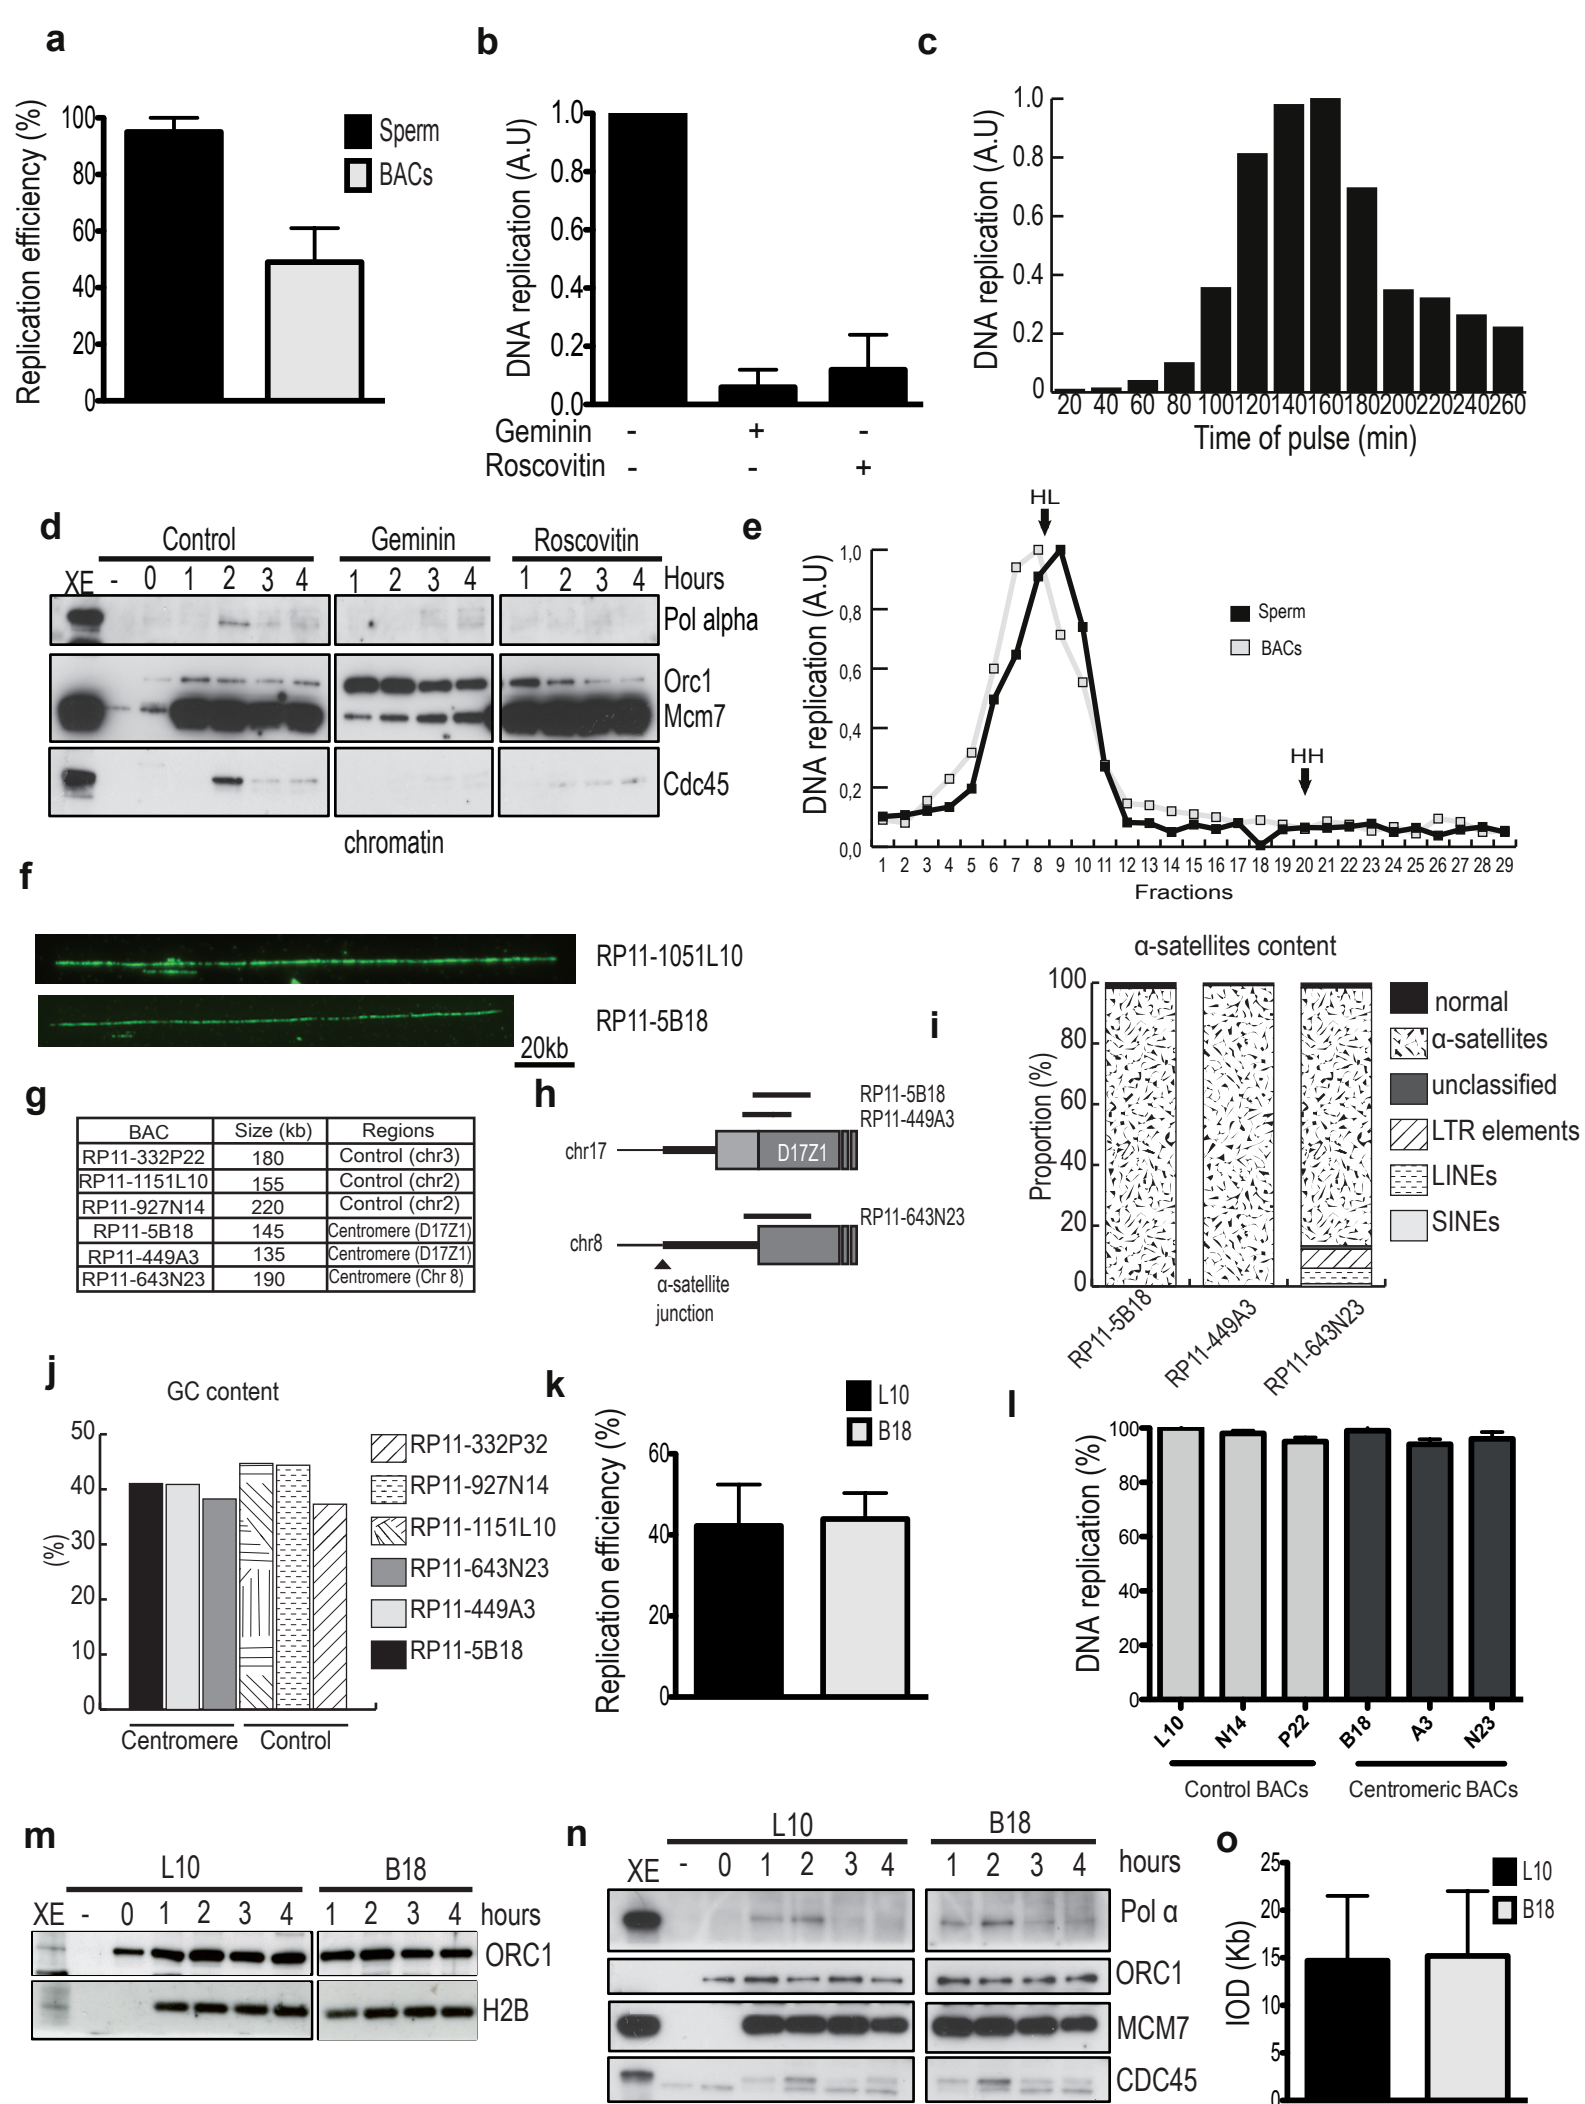

Supplementary Fig. 1

Supplement: NIHMS68292-supplement-Supplementary_Fig__1.pdf [file NIHMS68292-supplement-Supplementary_Fig__1.pdf]

**a**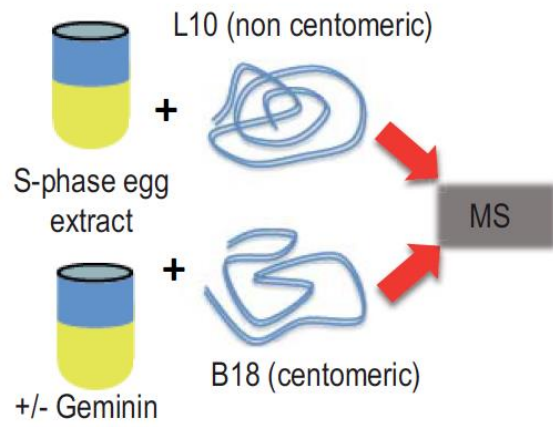**b**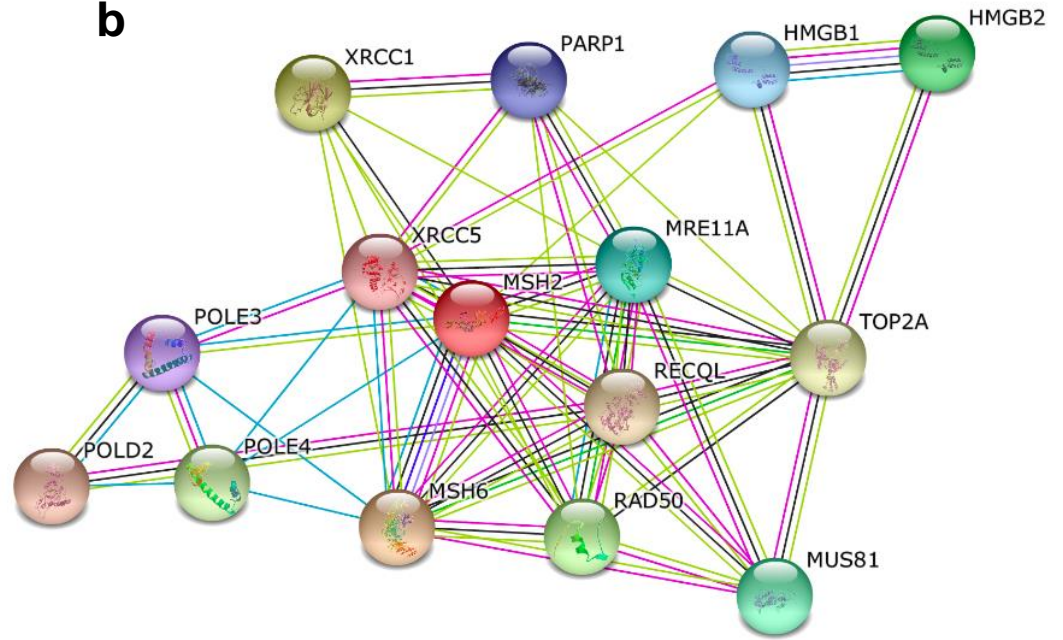**c**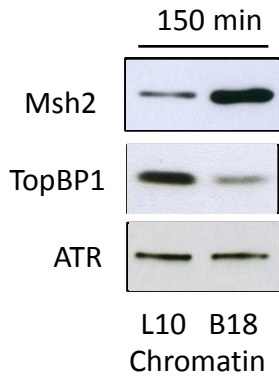**d**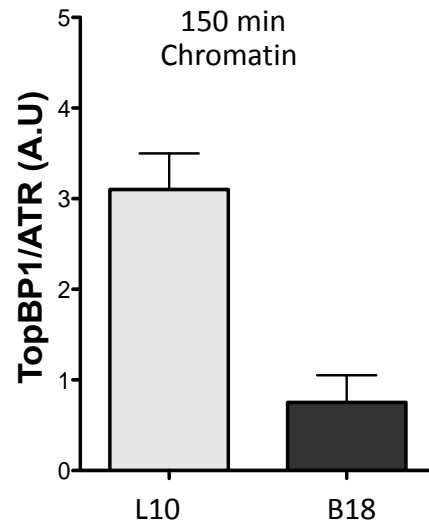**e**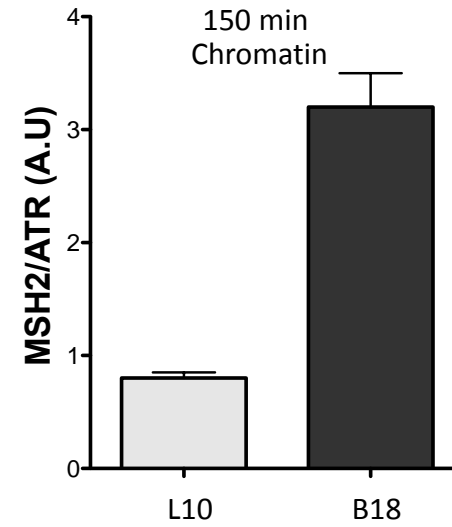

Supplementary Fig. 2

Supplement: NIHMS68292-supplement-Supplementary_Fig__2.pdf [file NIHMS68292-supplement-Supplementary_Fig__2.pdf]

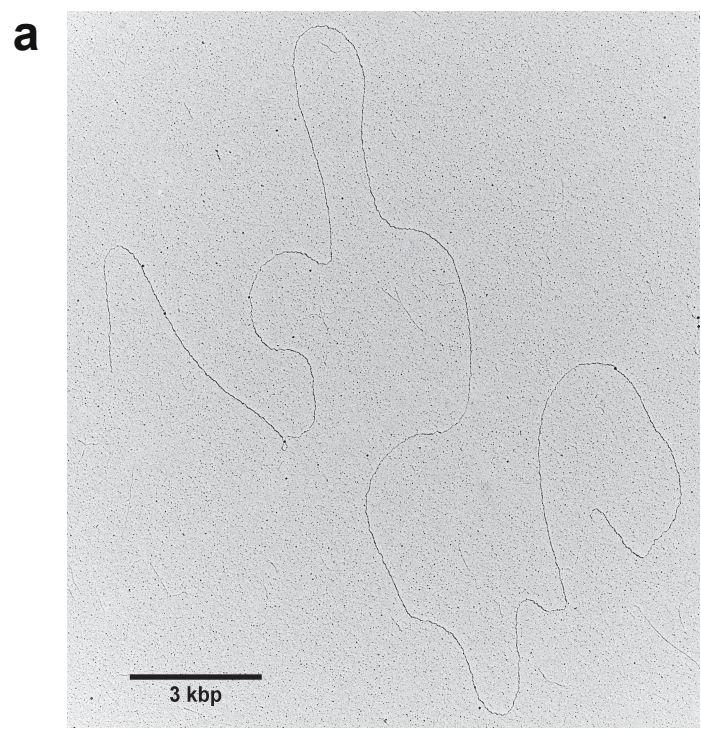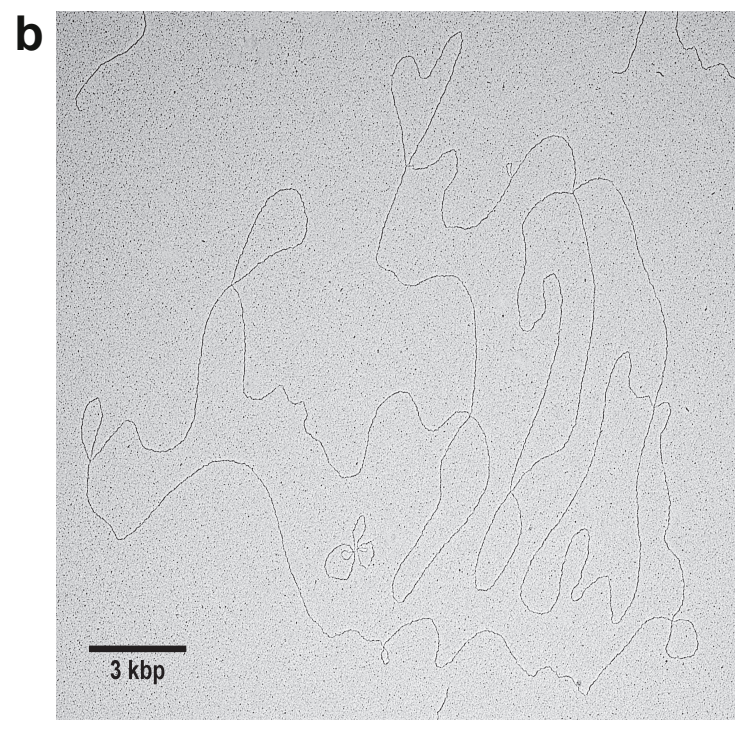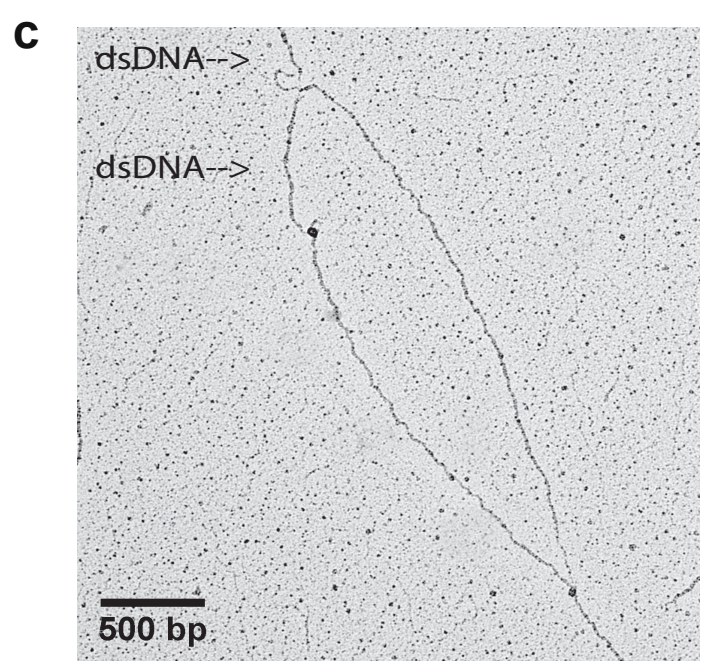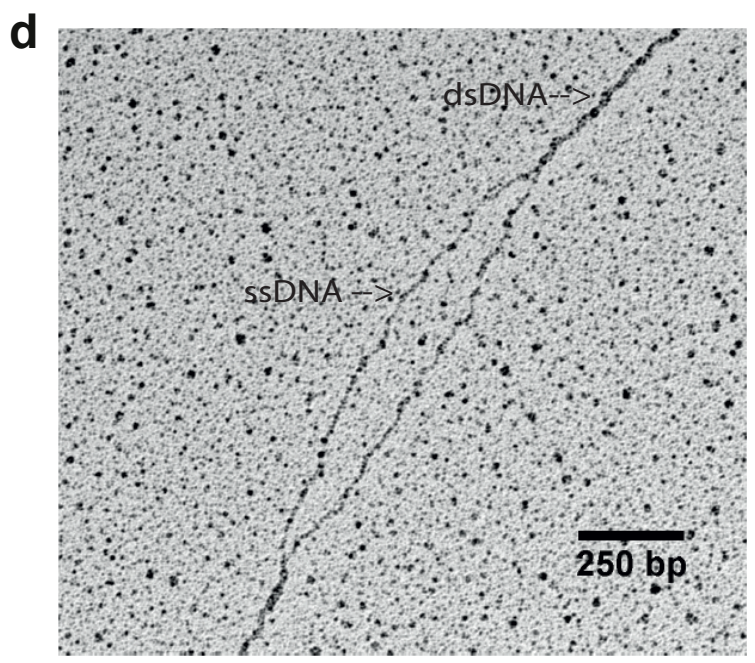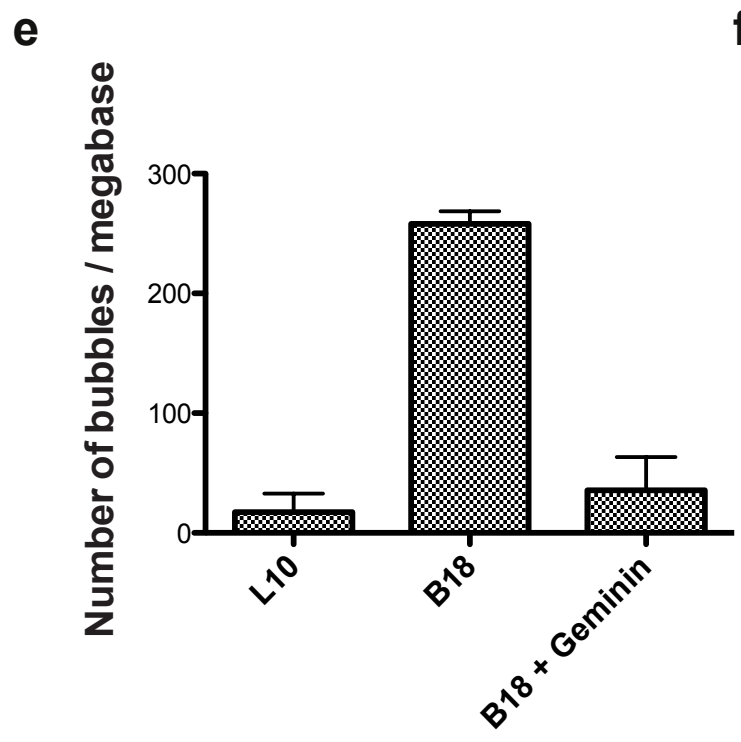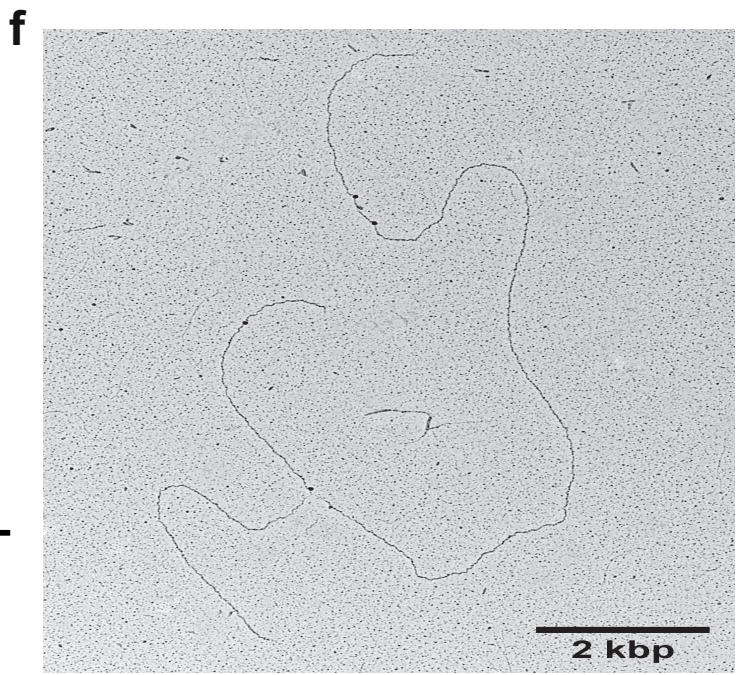

Supplementary Fig. 3

Supplement: NIHMS68292-supplement-Supplementary_Fig__3.pdf [file NIHMS68292-supplement-Supplementary_Fig__3.pdf]

**a**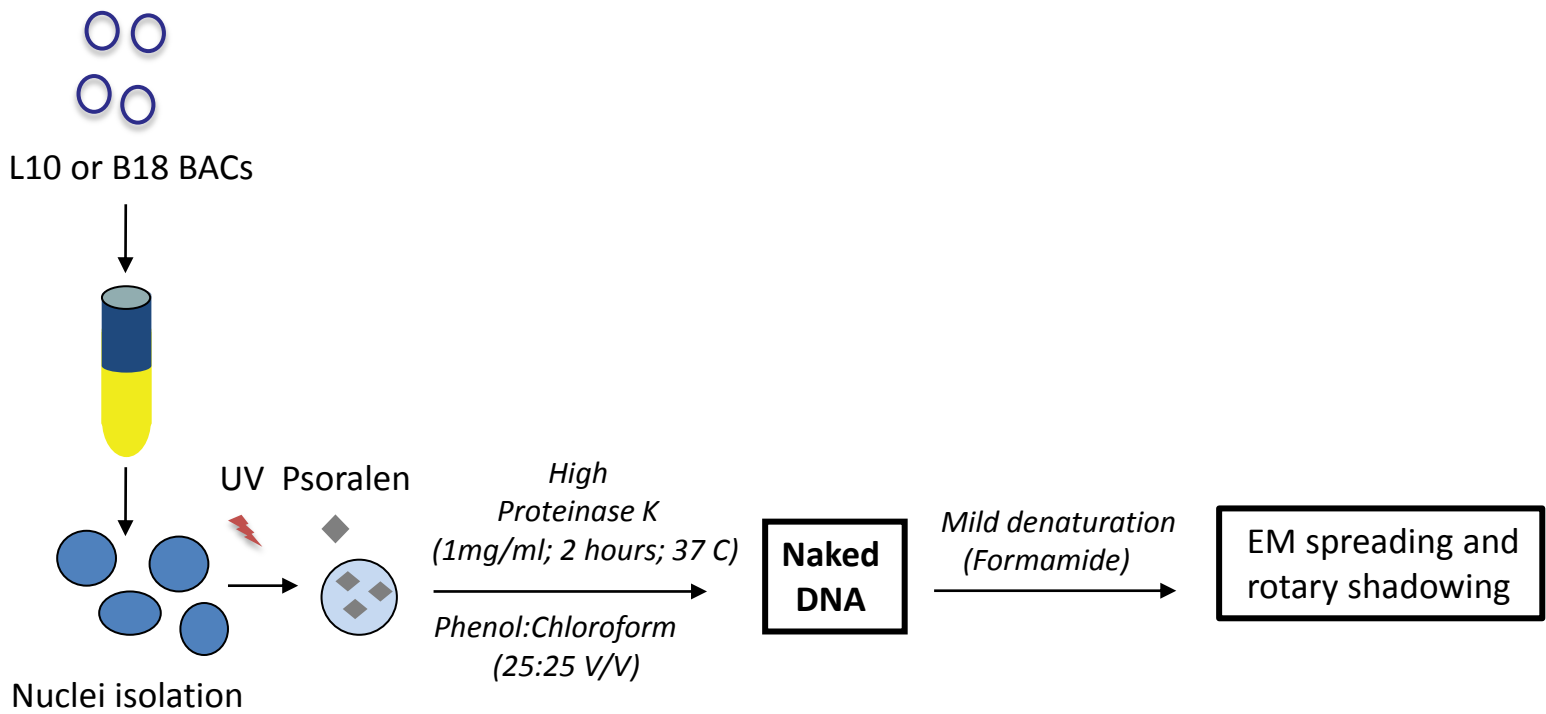**b**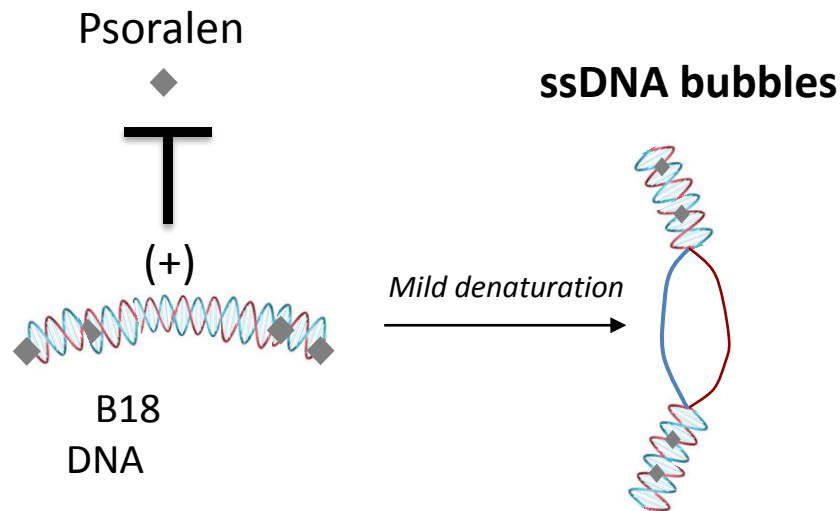

Supplement: NIHMS68292-supplement-Supplementary_Fig__4.pdf [file NIHMS68292-supplement-Supplementary_Fig__4.pdf]

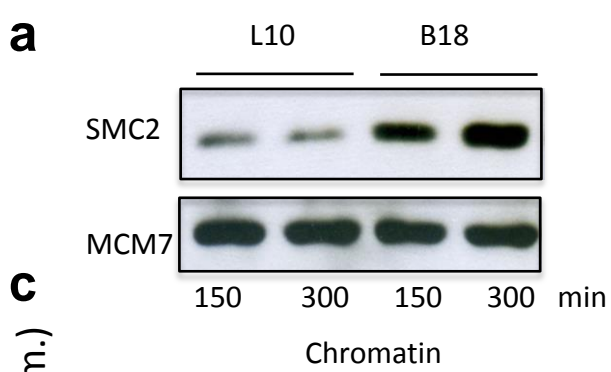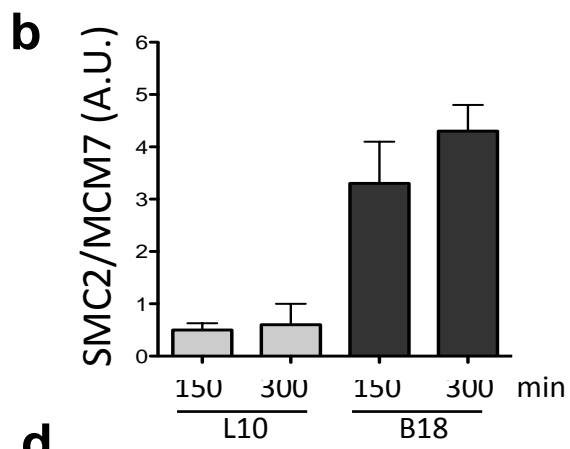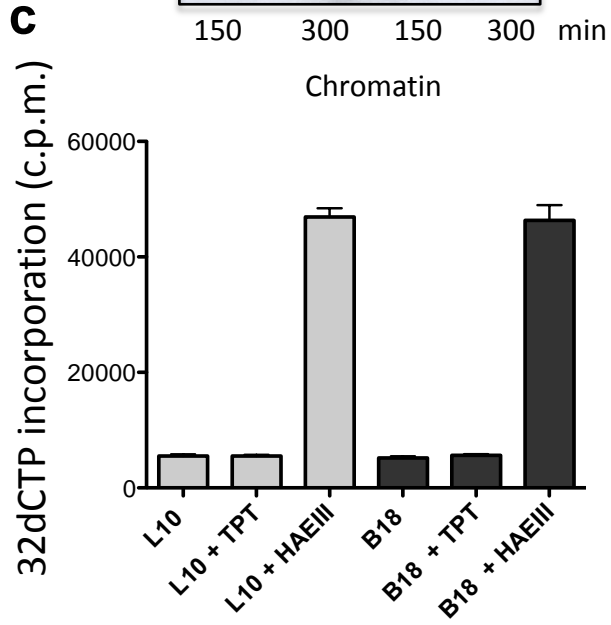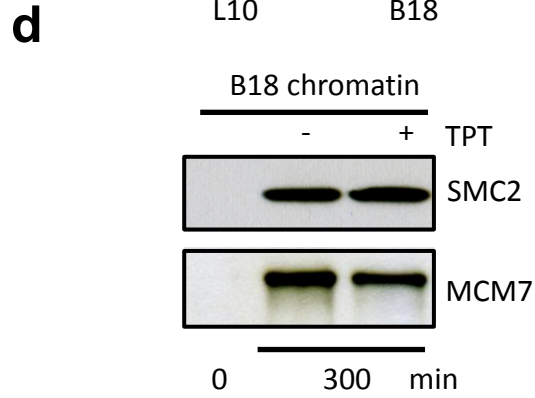

**e**

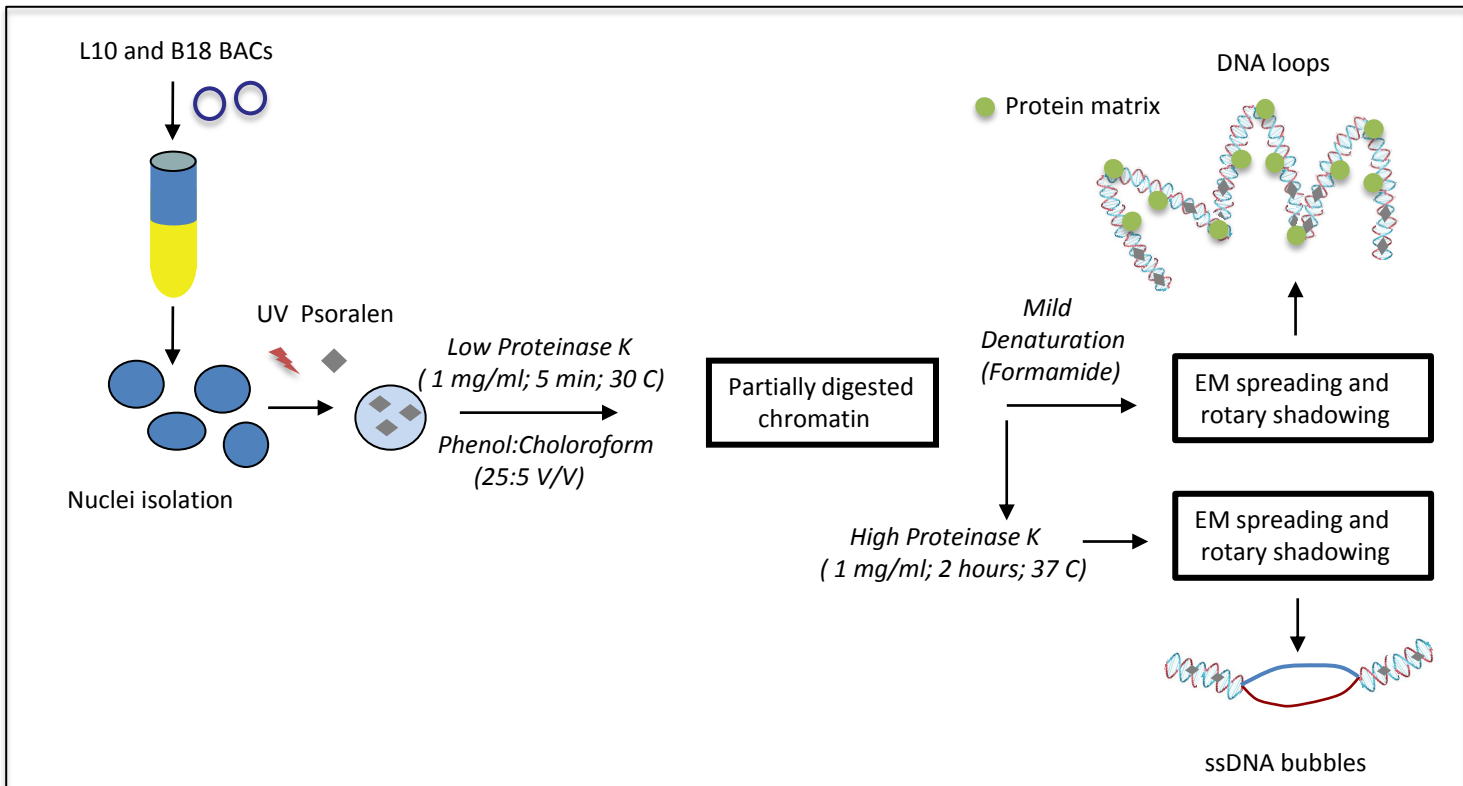

**f**

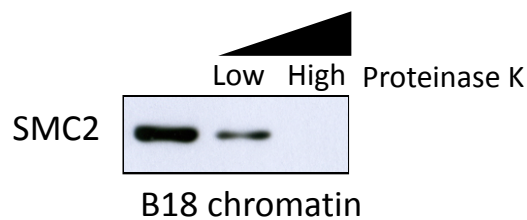

Supplementary Fig. 5

Supplement: NIHMS68292-supplement-Supplementary_Fig__5.pdf [file NIHMS68292-supplement-Supplementary_Fig__5.pdf]

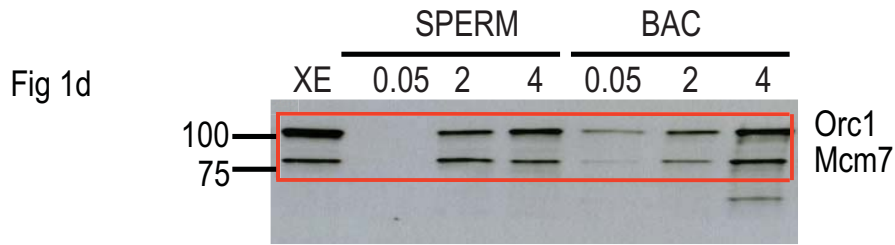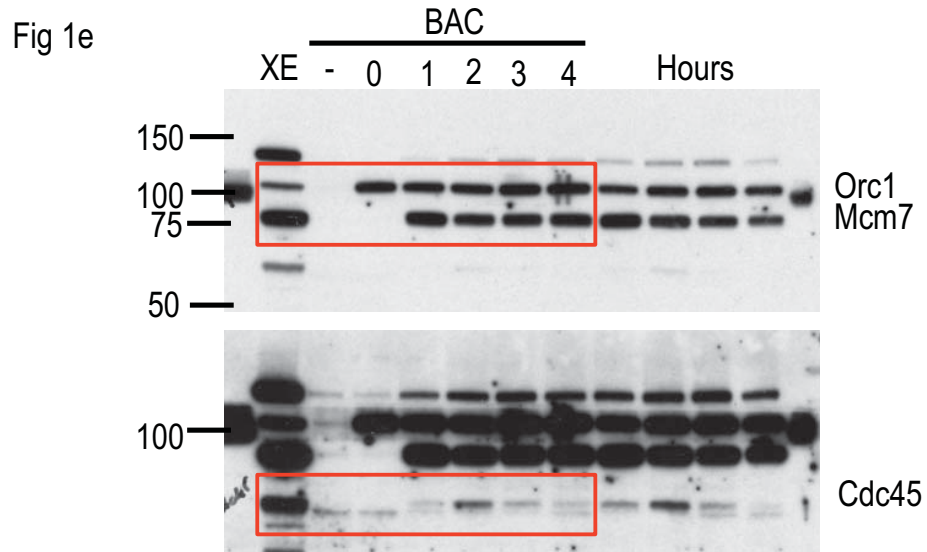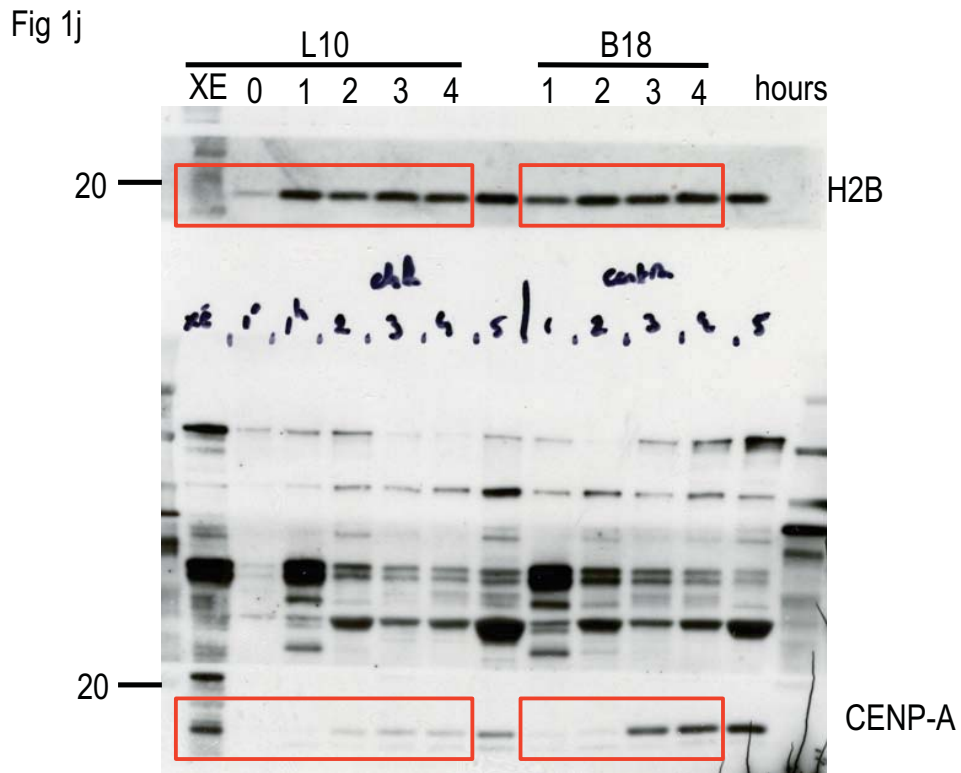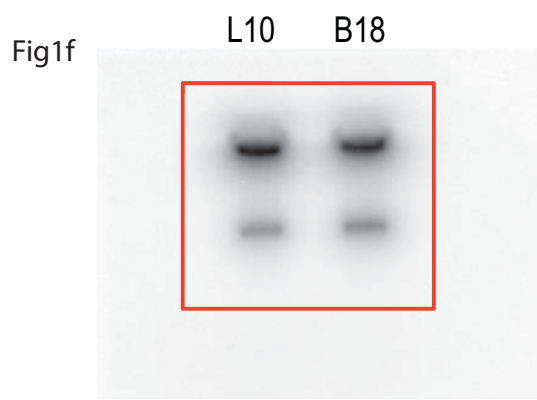

Fig 3a

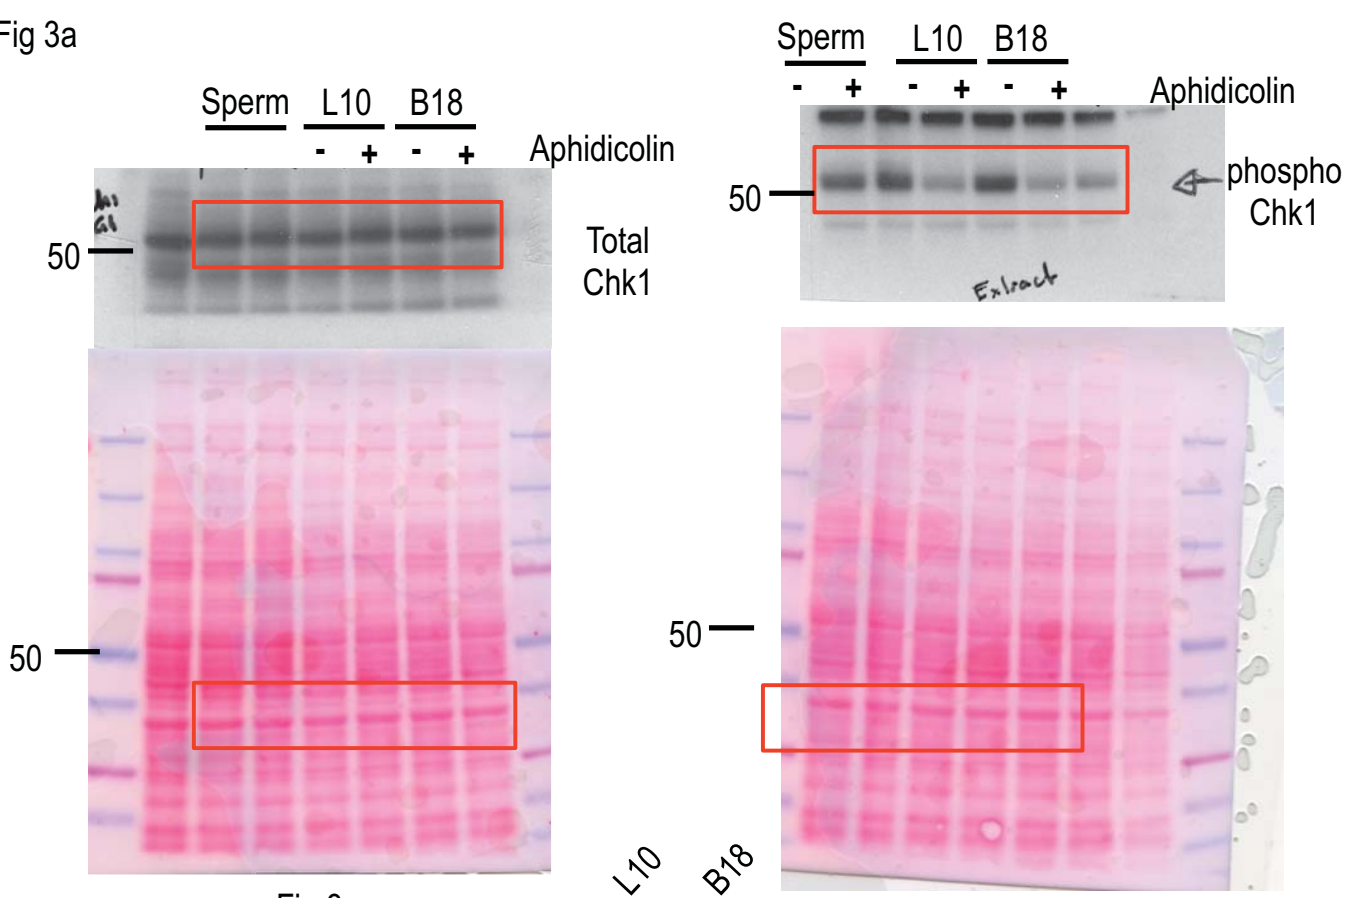

Fig 3c

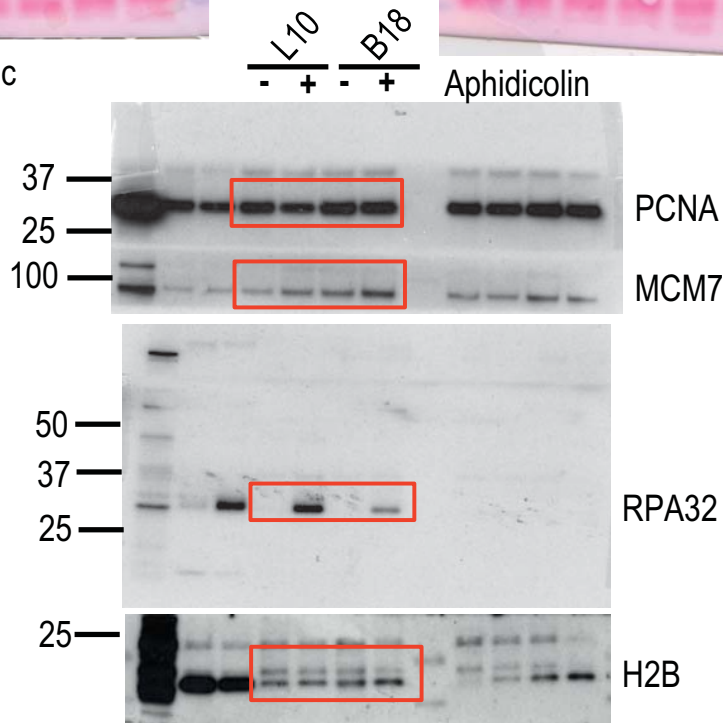

Fig 3e

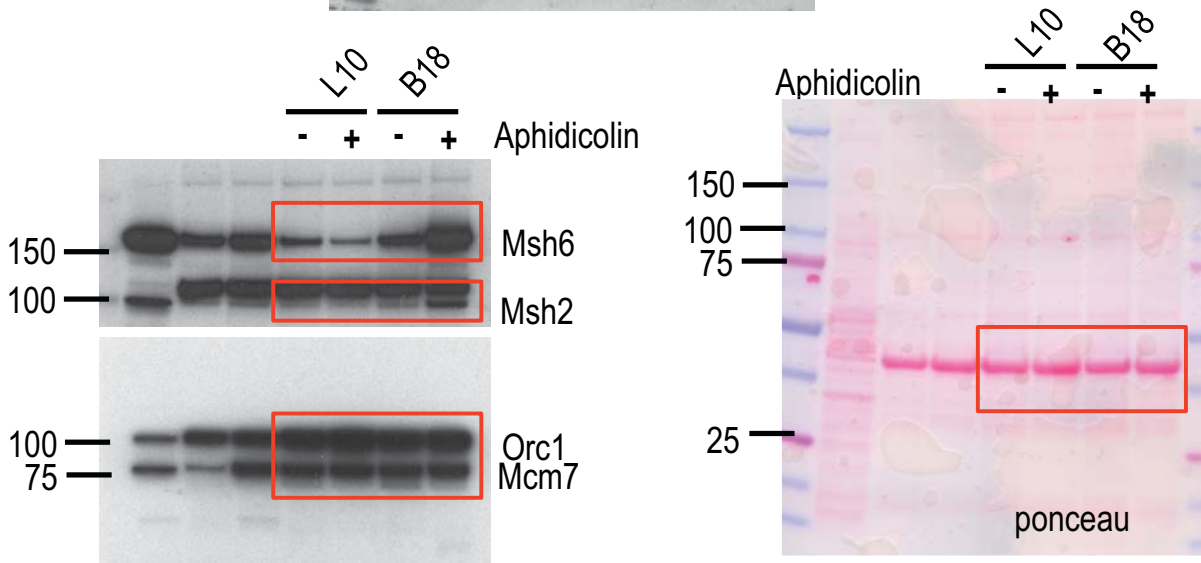

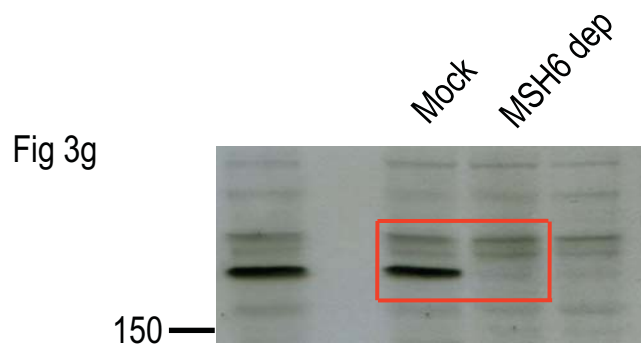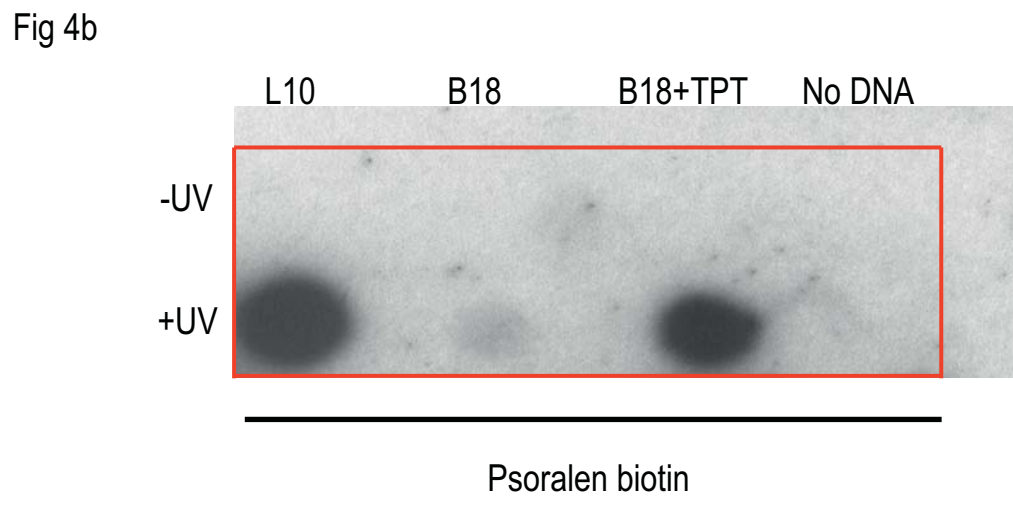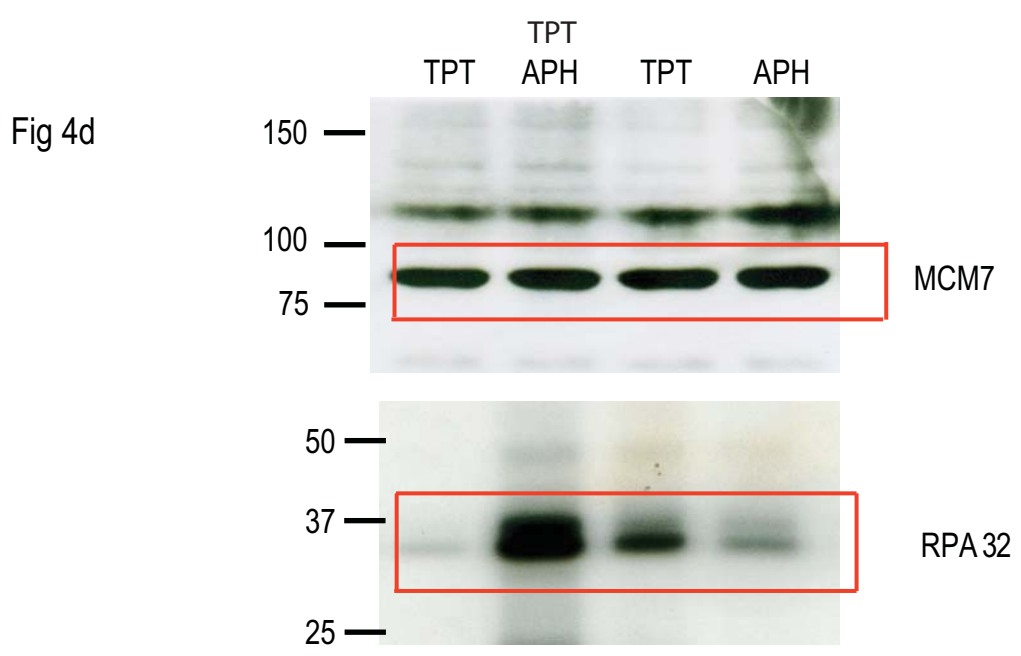

Fig S1d

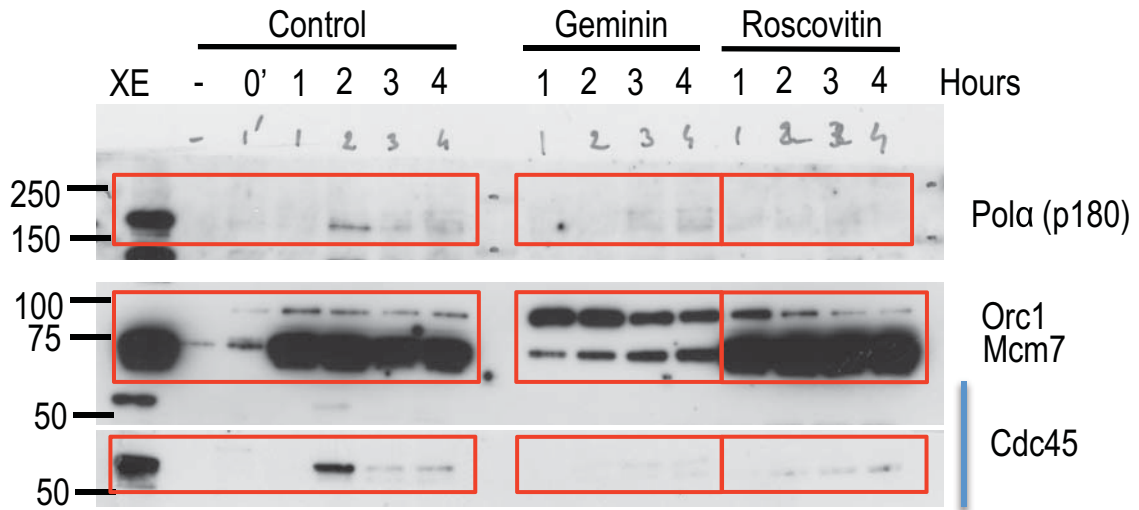

Fig S1m

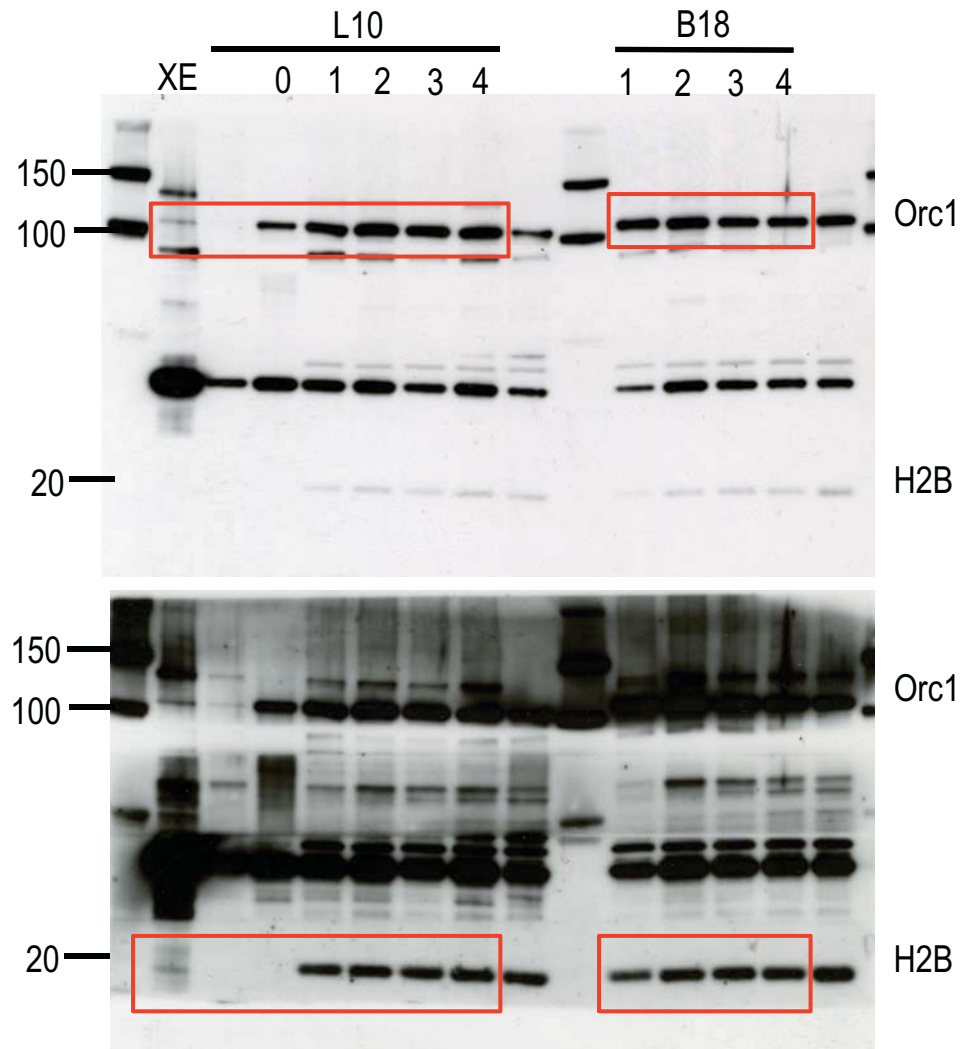

Fig S1n

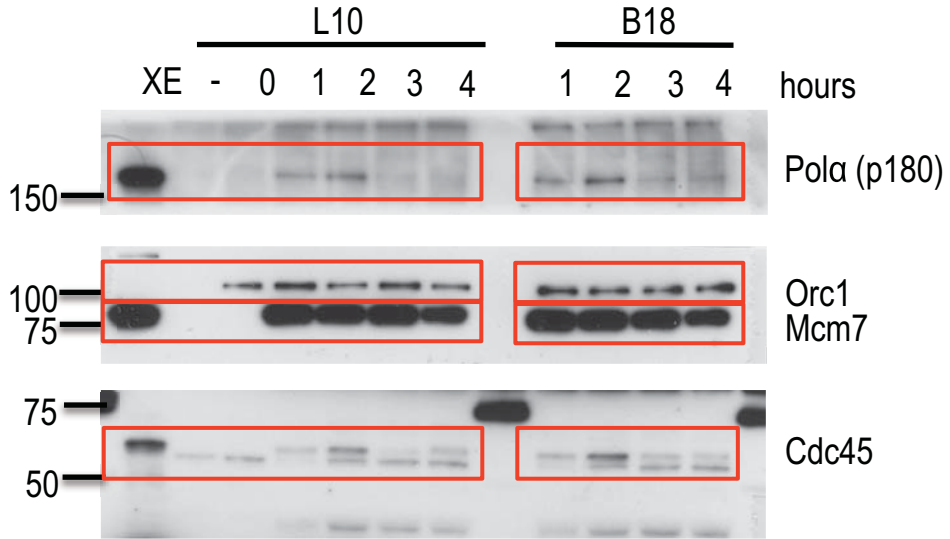

Fig S2c

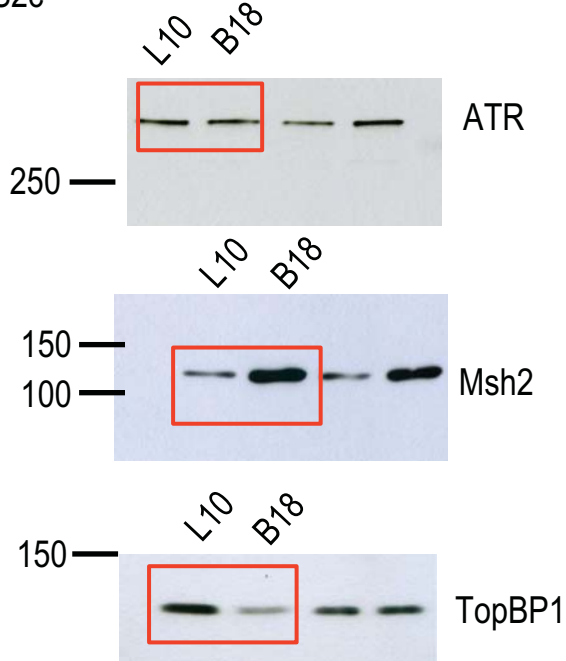

Fig S5a

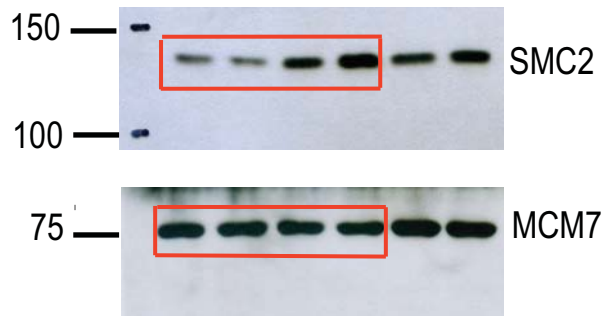

Fig S5d

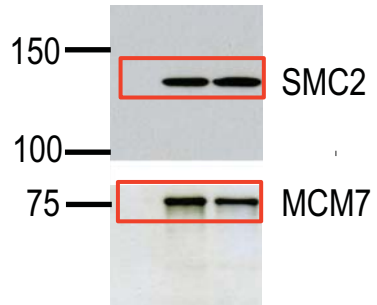

Fig S5f

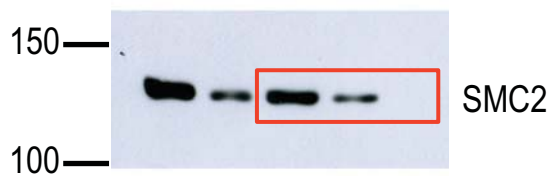

Supplement: NIHMS68292-supplement-Supplementary_Fig__6.pdf [file NIHMS68292-supplement-Supplementary_Fig__6.pdf]
